# Supplementary material for: A bis-chalcone based colorimetric probe for the selective detection of bisulfite/sulfite anions: exploring surfactant promoted Michael addition of anions to α, β-unsaturated ketones
Source: Royal Society of Chemistry journal article supplement (doi:10.1039/d2ra06832j), 2023-01-01
Supplement: d2ra06832j1.pdf [file d2ra06832j1.pdf]

## Electronic Supplementary Information

### **Bis-chalcone based colorimetric probe for the selective detection of bisulfite/sulfite anions: exploring surfactant promoted Michael addition of anions to $\alpha$ , $\beta$ -unsaturated ketone.**

Sowmya P, Sivakrishna Prakash, and Abraham Joseph\*

Department of Chemistry, University of Calicut, Calicut University P O, 673 635, Kerala, India. [abrahamjoseph@uoc.ac.in](mailto:abrahamjoseph@uoc.ac.in)

#### **Synthesis of the probe (1E,4E)-1,5-di(thiophen-2-yl) penta-1,4-dien-3-one**

To a mixture of 1.87 ml (0.02 mol) of thiophene-2-carboxaldehyde, 2g (0.05 mol) NaOH in water (0.1g/ml ratio), 40 mL of EtOH and 60 mL of water, 0.74 ml (0.01 mol) of acetone was added dropwise. The reaction was carried out at room temperature for 1 h and the reaction mixture was poured into crushed ice. The yellow crystalline solid was collected by filtration and dried to give 2.19 g (89%) of product, mp 114-116.5 °C: <sup>1</sup>H NMR (400 MHz, CDCl<sub>3</sub>, TMS):  $\delta$  7.83 (d, 2 H, J = 15 Hz), 7.40 (d, 2 H, J = 5.0 Hz), 7.33 (d, 2 H, J = 3.6 Hz), 7.08 (dd, 2H, J = 3.6, 5.0 Hz), 6.82 (d, 2 H, J = 15 Hz); <sup>13</sup>C NMR (400 MHz, CDCl<sub>3</sub>):  $\delta$  187.8, 140.3, 135.6, 131.9, 128.8, 128.3, 124.4; MS (EI, 70 eV): *m/z* (%) 246 ; Ir (KBr) 3087, 1661, 1604, 1565, 1105, 749, 729 cm<sup>-1</sup>.

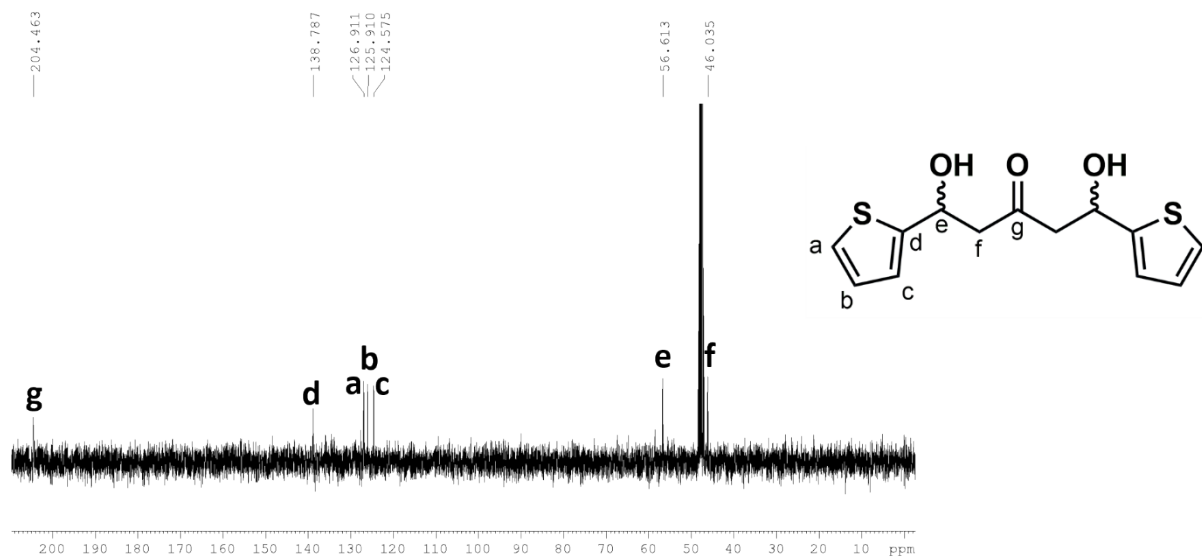

**Fig. S1.**  $^{13}\text{C}$  NMR spectra of the probe-OH adduct in  $\text{CD}_3\text{OD}$ .

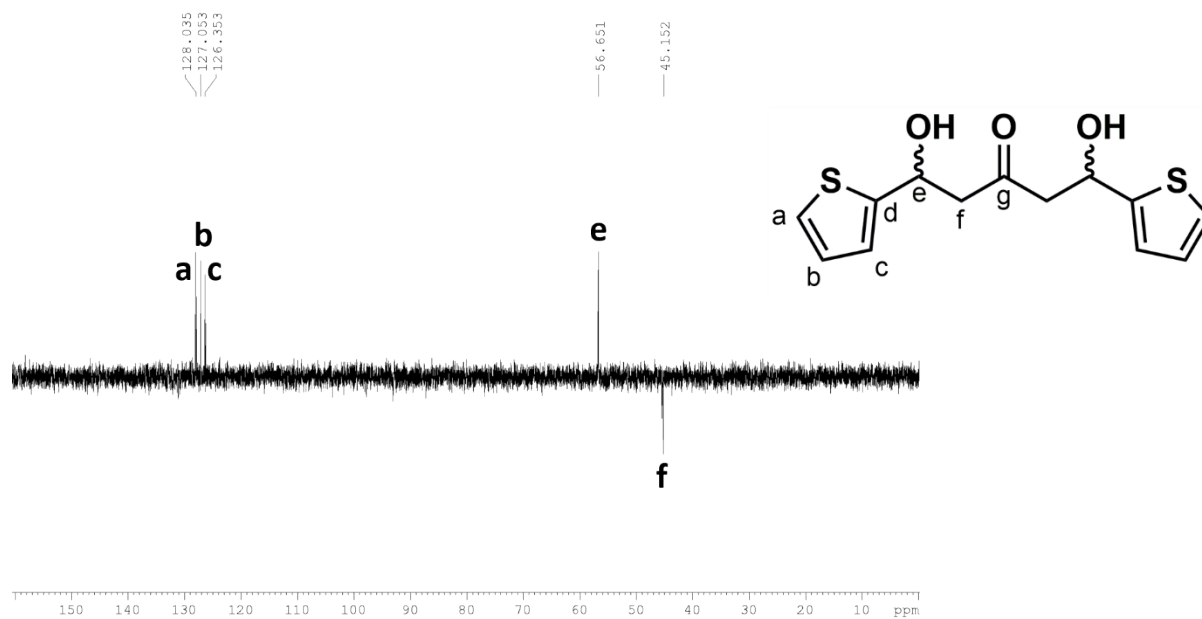

**Fig. S2.** DEPT analysis spectra of the probe-OH adduct in CD<sub>3</sub>OD.

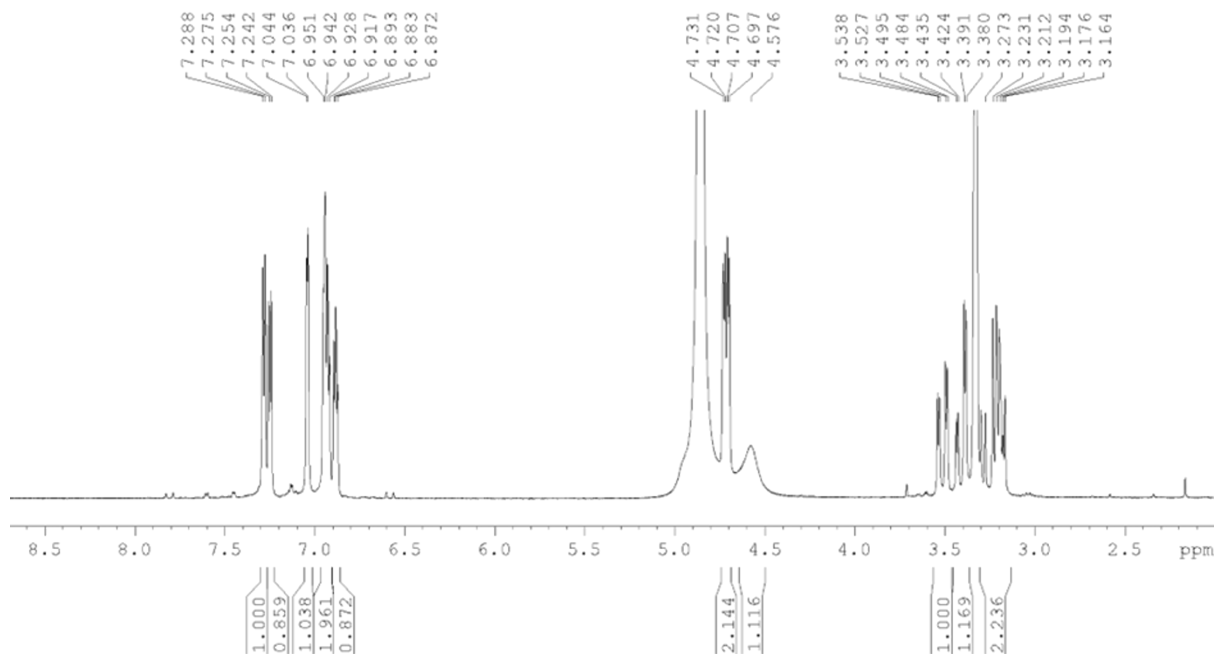

**Fig. S3.**  $^1\text{H}$  NMR spectra of the probe-OH adduct in  $\text{CD}_3\text{OD}$ .

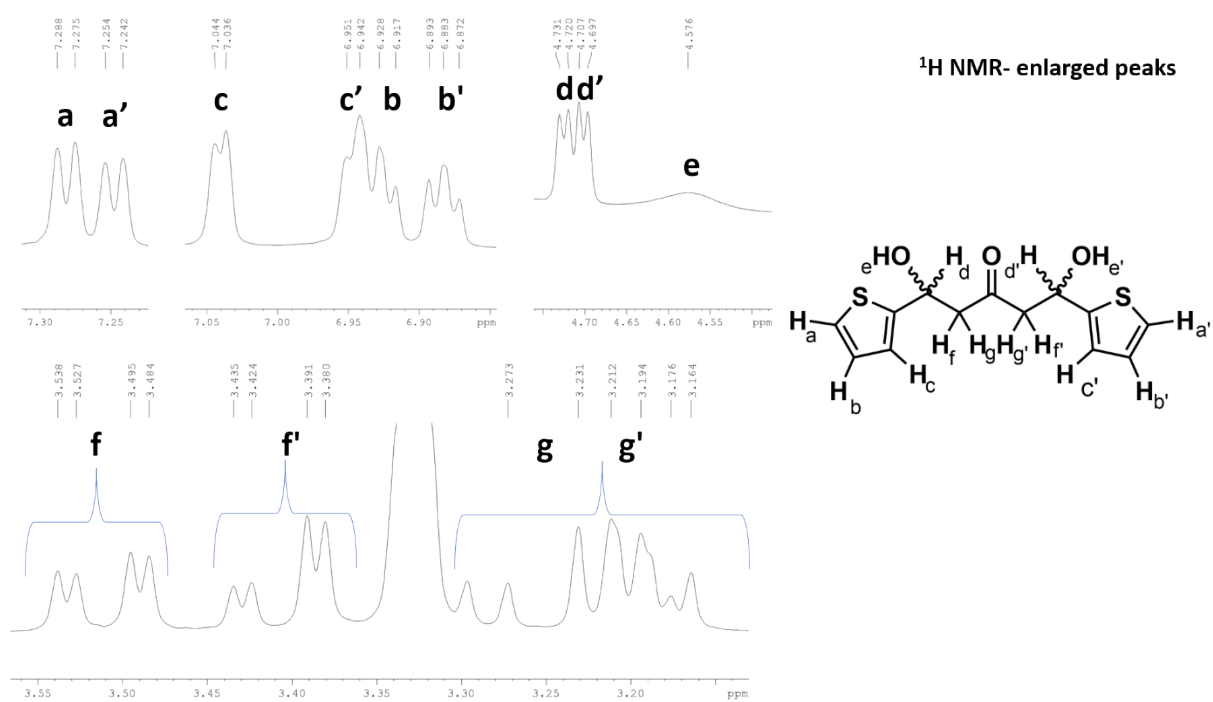

**Fig. S4.** Enlarged <sup>1</sup>H NMR spectra of the probe-OH adduct in CD<sub>3</sub>OD.

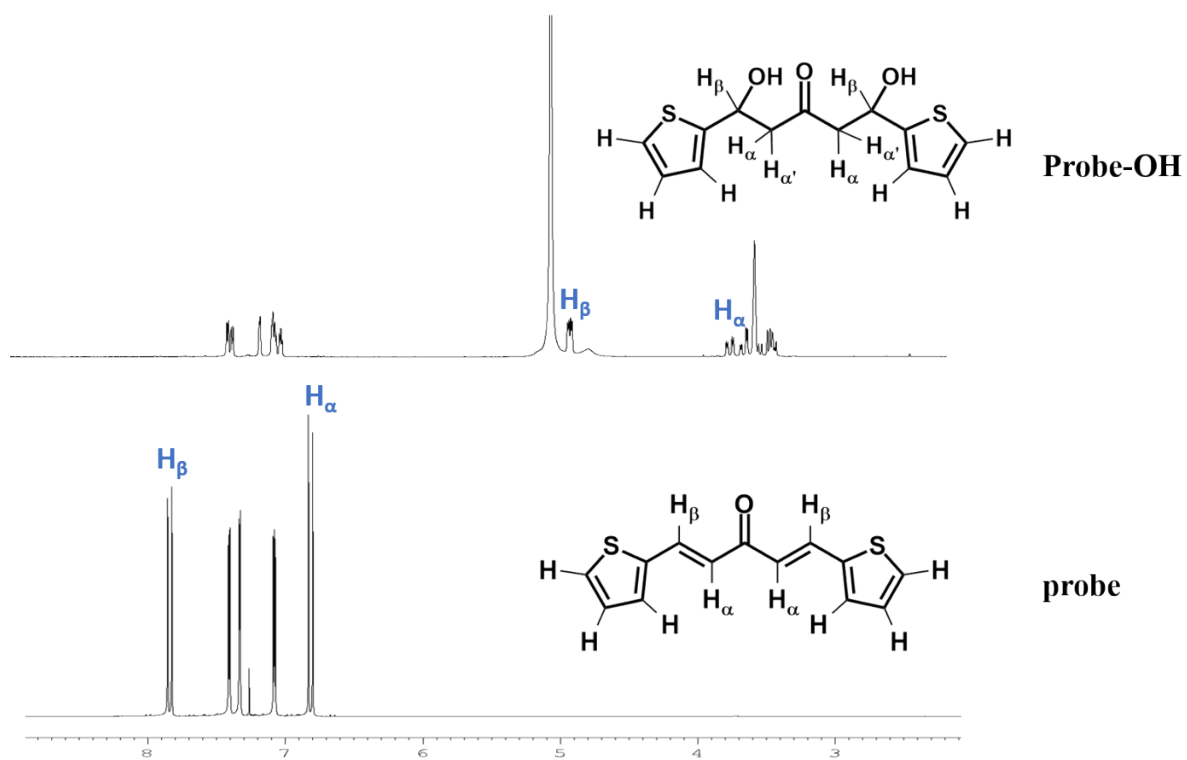

**Fig. S5.** <sup>1</sup>H NMR spectra of the probe and probe-OH in CDCl<sub>3</sub> and CD<sub>3</sub>OD respectively.

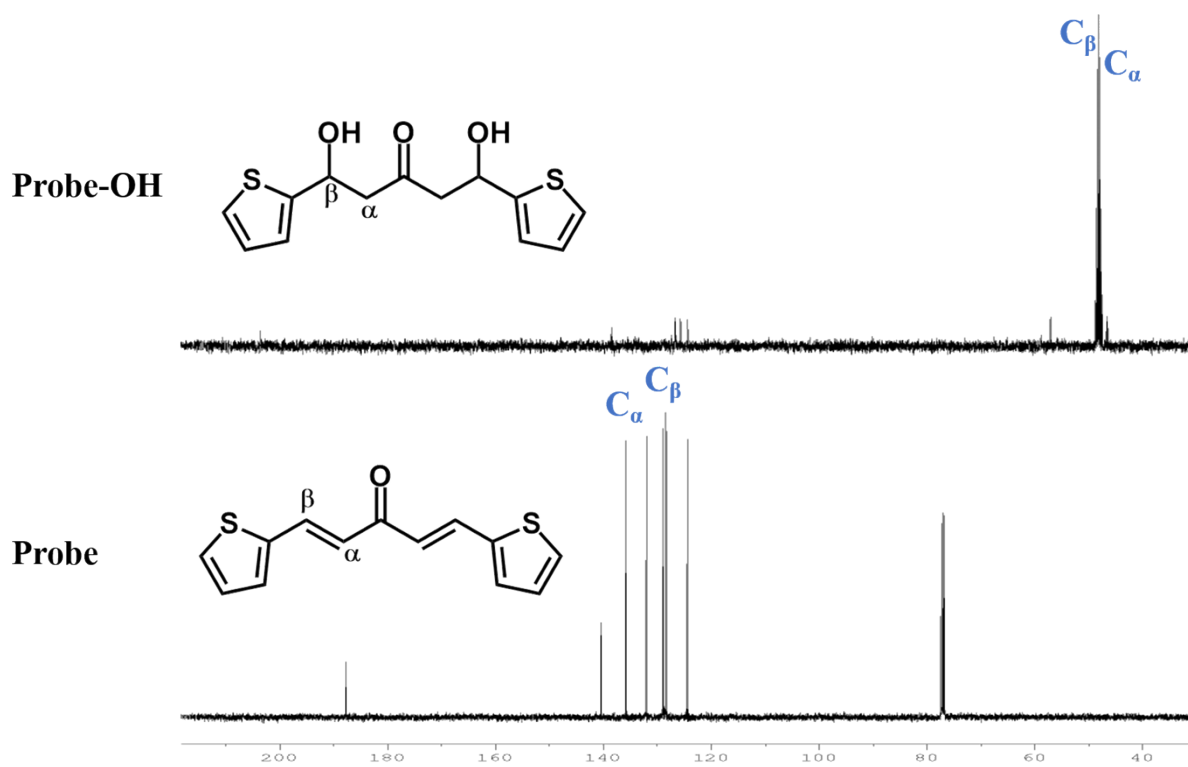

**Fig. S6.**  $^{13}\text{C}$  NMR spectra of the probe and probe-OH in  $\text{CDCl}_3$  and  $\text{CD}_3\text{OD}$  respectively.

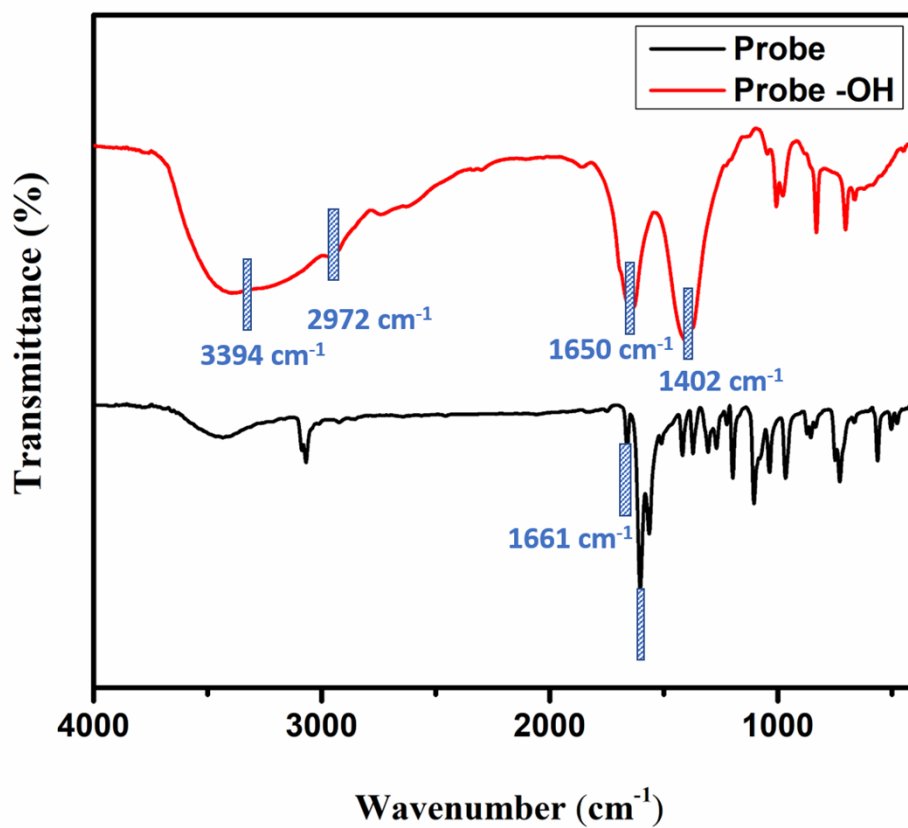

Fig. S7. FT-IR spectrum of the probe and probe-OH.



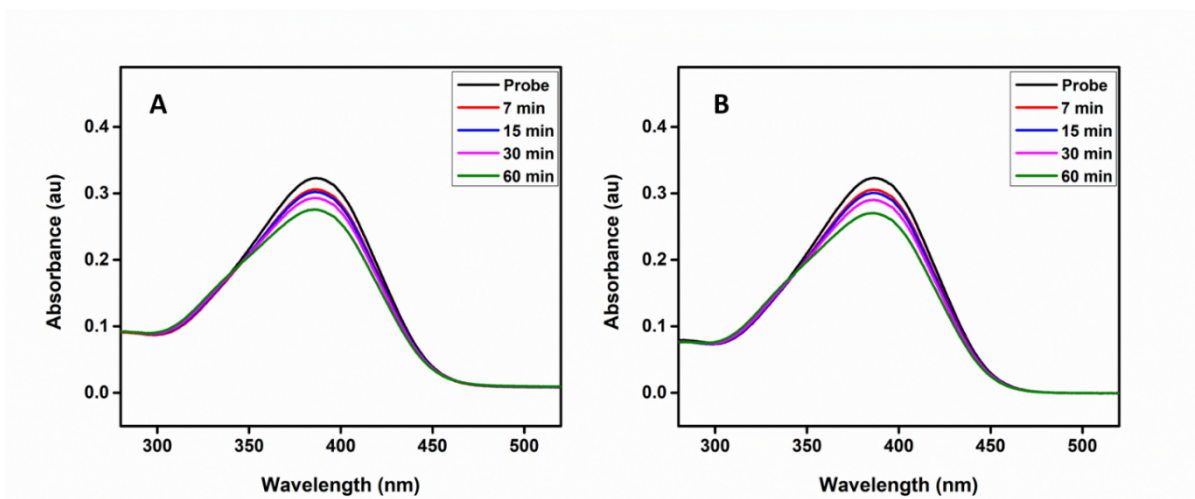

**Fig. S8.** (A) Absorption spectra of probe (10 μM) upon the addition of NaHSO<sub>3</sub> (200 μM) and (B) Na<sub>2</sub>SO<sub>3</sub> (200 μM) respectively in HEPES buffer solution (20 mM, pH 7.4) in the absence of CTAB.

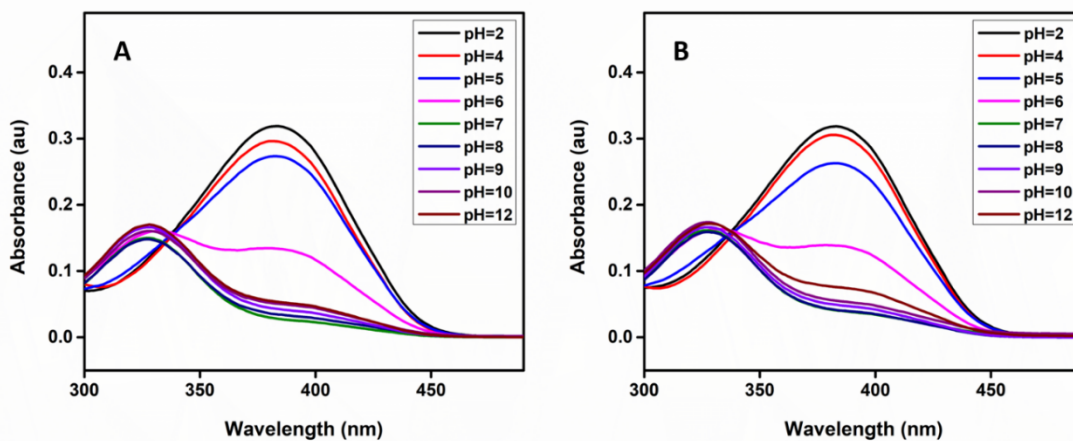

**Fig. S9.** (A) Spectra for the reaction between probe (10 μM) and NaHSO<sub>3</sub> (200 μM) and (B) Na<sub>2</sub>SO<sub>3</sub> (200 μM) respectively at different pH values.

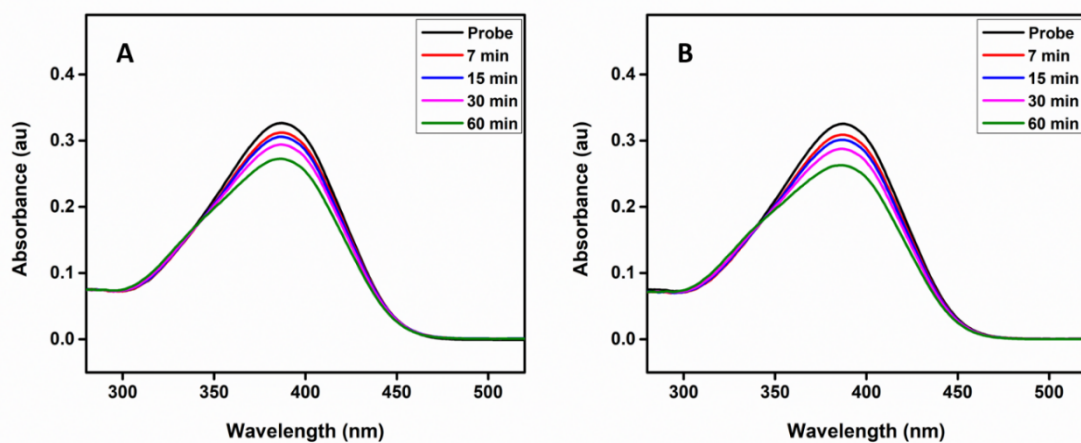

**Fig. S10.** (A) Absorption spectra of probe (10 μM) upon the addition of NaHSO<sub>3</sub> (200 μM) and (B) Na<sub>2</sub>SO<sub>3</sub> (200 μM) respectively in HEPES buffer solution (20 mM, pH 7.4) in the presence of anionic surfactant SDBS.

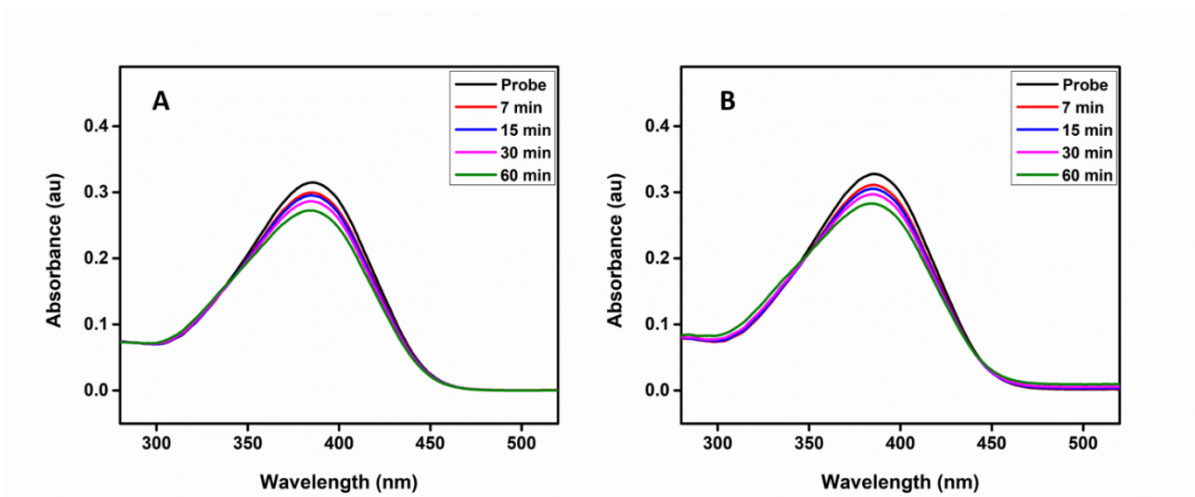

**Fig. S11.** (A) Absorption spectra of probe (10 μM) upon the addition of NaHSO<sub>3</sub> (200 μM) and (B) Na<sub>2</sub>SO<sub>3</sub> (200 μM) respectively in HEPES buffer solution (20 mM, pH 7.4) in the presence of zwitter ionic surfactant CAPB.
